# Supplementary material
Source: PubMed Central journal article supplement (PMC3563400)
Supplement: 97320630009067S1.pdf [file 97320630009067S1.pdf]

## Supplementary material:

**Table 1:** List of *Heterodera avenae* geographical isolates, used for the study

| <b>Geographical location</b> | <b>Accession number</b> | <b>Source</b> |
|------------------------------|-------------------------|---------------|
| India(Delhi)                 | KC152906                | Umarao        |
| Germany                      | AY148387                | Subbotin      |
| China                        | GU377252                | Wang          |
| Australia                    | HM560737                | Peng          |
| Israel                       | AY148363                | Subbotin      |
